# Supplementary material for: Expression of glucagon-like peptide-1 and glucose-dependent insulinotropic polypeptide in the rat submandibular gland is influenced by pre- and post-natal high-fat diet exposure
Source: Frontiers journal article supplement (doi:10.3389/fphys.2024.1357730), 2024-03-26
Supplement: Data_Sheet_1.pdf [file Data_Sheet_1.pdf]

## *Supplementary Material*

# **Expression of glucagon-like peptide-1 and glucose-dependent insulintropic polypeptide in the rat submandibular gland is influenced by pre- and post-natal high-fat diet exposure**

**Pornchanok Sangsuriyothai<sup>1, 2</sup>, Ippei Watari<sup>1\*</sup>, Saranya Serirukchutarungsee<sup>1,3</sup> Sirichom Satrawaha<sup>2</sup>, Katarzyna Anna Podyma-Inoue<sup>4</sup>, Takashi Ono<sup>1</sup>**

<sup>1</sup>Department of Orthodontic Science, Graduate School of Medical and Dental Sciences, Tokyo Medical and Dental University (TMDU), Tokyo, Japan

<sup>2</sup>Department of Orthodontics, Faculty of Dentistry, Chulalongkorn University, Bangkok, Thailand

<sup>3</sup>Department of Pedodontics and Preventive Dentistry, Faculty of Dentistry, Srinakharinwirot University, Bangkok, Thailand

<sup>4</sup>Department of Biochemistry, Graduate School of Medical and Dental Sciences, Tokyo Medical and Dental University (TMDU), Tokyo, Japan

\* **Correspondence:** Ippei Watari: [ippeiwatari@gmail.com](mailto:ippeiwatari@gmail.com)

## **1 Supplementary Table 1**

| Composition<br>Type of food | CE-2  | HFD32 |
|-----------------------------|-------|-------|
| Moisture                    | 9.05  | 6.20  |
| Crude protein               | 24.80 | 25.50 |
| Crude fat                   | 4.60  | 32.00 |
| Crude fiber                 | 4.65  | 2.90  |
| Crude ash                   | 7.00  | 4.00  |
| NFE                         | 49.90 | 29.40 |

All values are reported as percentages by weight.

**Supplementary Table 1** The composition of each type of food which were given to rats (the nutrient components in 100 g)
